# Supplementary material for: Heparin-binding protein in ventilator-induced lung injury
Source: Intensive Care Med Exp. 2018 Sep 10;6:33. doi: 10.1186/s40635-018-0198-x (PMC6131685; doi:10.1186/s40635-018-0198-x)
Supplement: Supplementary file 1 — Datasets. Datasets of ICU patients, pigs and healthy volunteers. (XLSX 13 kb) [file 40635_2018_198_MOESM1_ESM.xlsx]

## Sheet: Blad1
case #	prel dx	sev sepsis/ ej sev sesis	SAPS3	EMR	MAX SOFA	ARDS(1=mild,2=mod,3=severe)	ARDS(0=no,mild.1=mod,sev)	Bara svikt	Bilat infiltrat	tid till int (h)	a1	a2	a3	i1	i2	i3	HBP1	HBP2	HBP3	BAL HBP	BAL LPK x10^6	BAL mono%	topptryck	PEEP	tidalvolym	ventmode	FiO2	Vikt	TV ml/kg
2	pneumoni	1	76	67.5	20	3	1	0	1	1.5	4241					124.9	4241	1220.4	124.9	25	77	80	26	9	750	BIPAP/ASB	50	119	6.3
7	asp pneumoni		65	46.2	12	2	1	0	1	0	23.9				53.1	17	23.9	53.1	17	1098	3010	9	15	8	400	BIPAP/ASB	35	63	6.3
26	pneumoni	1	91	85.6	10	3	1	0	1	1	70	77		17.8		17	70	17.8	17	1614.3	2000	18	22	9	450	BIPAP/ASB	40	81	5.6
38	pneumoni	1	83	77.6	9	3	1	0	1	0	24.1				28.9	28.1	24.1	28.9	28.1	1341.7	10300	6	28	11	500	BIPAP/ASB	55	82	6.1
65	Fascheit	1	61	37.7	10	0	0	0	0	44	57.1	110.5	87.5	82.2	102.2	58.4	57.1	110.5	87.5	4558	84	33	26	12	500	BIPAP/ASB	45	80	6.3
78	EP		65	46.2	11	0	0	0	0	48	36.8	796.7	35.2	28.7	38.1	42.7	36.8	796.7	35.2	3254	1770	6	14	5	400	BIPAP/ASB	30	72	5.6
115	trauma		53	22.1	9	1	0	0	1						46.7	33.2	46.7	33.2	*	2325.8	5510	39	20	10	600	BIPAP/ASB	35	81	7.4
132	pneumoni	1	56	27.6	6	0	0	0	0	22	35.7	30	55.1	43.4	48.5	82.8	35.7	30	55.1	4646	3320	9	24	12	600	BIPAP/ASB	50	109	5.5
231	skalltrauma		51	18.9	10	2	1	0	1	0	13.8	35.4	25.4	13.3			13.8	35.4	25.4	2303	19500	9	17	8	500	BIPAP/ASB	60	74	6.8
260	pneumoni	1	68	52.5	6	1	0	0	1	0	47.7			33.9	20.2	23.5	47.7	33.9	20.2	251.9	362	31	15	7	450	BIPAP/ASB	35	76	5.9
																																					0.98
																																					0.96
																																					0.99
																																					0.87
																																					0.81
																																					0.91
																																					1.06
																																					0.88
																																					0.73
																																					0.74
																																					0.85
																																					1.1
																																					1.14
																																					0.88
																																					0.79
																																					1.31
Pig nr	p1	p2	p3	p4	p5	p6	b1	b2	b3	b4	b5	b6	protektiv=0 ej protektiv=1	track=1 intub=0	n1	n3	n4	n5	n6	b1/n1	b3/n3	b4/n4	b5/n5	b6/n6
1	16.06	18.35	19.83	26.74	33.88	45.52	23.93	20.61	42.94	277.84	1292.26	1244.32	1	1
2	16.04	17.45	19.45	24.69			20.61	20.41	19.6	238.01			1	1
3	20.96	22.51	20.01	25.71	64.37		47.35	24.57	32.19	467.93	576.18		1	1
4	14.5	16.03	19.83	19.83	24.49	32.54	270.1	31.39	21.48	27.76	304.5	211.62	0	1	2.16	1.12	0.6	4.9	2.02	125	19	46	62	104
5	26.53	28.63	37.55	39.2	38.49	45.02	15.93	19.46	32.37	102.34	63.67	110.62	1	1	1.34	0.69	8.1	0.9	2.09	11	46	12	70	52
6	19.64	23.09	18.35	17.81	20.39	54.8	18.64	14.11	25.91	540.31	909.35	1103.58	1	1	1.36	2.68	14.04	24.54	17.96	13	9	38	37	61
7	20.96	20.39	21.34	20.39	31.22	80.77	13.37	32.17	46.68	48.48	808.87	1184.51	1	1	0.39	1.94	4.6	19.6	23.94	34	24	10	41	49
8	21.54	23.01	64.93	17.99	24.29	32.76	53.07	32.77	23.4	46.23	25.91	128.13	0	1	0.55	1.19	2.25	1.88	2.67	96	19	20	13	47
9	19.45	17.45	20.39	25.5	39.19	19.83	15.01	15.01	21.48	134.16	29.08	20.8	0	1	2	1.51	2.68		2.08	7	14	50	#########	10
10	24.57		36.71	30.11	41.17	48.14	36.62		18.35	22.31	16.91	50.6	0	1	1.71	0.86	1.98	0.57	2.87	21	21	11	29	17
11	21.84		25	28.08	38.67	67.43	17.25		17.83	191.14	1664.02	1786.65	1	0	0.16	0.95	4.67	29.45	36.91	107	18	40	56	48
12	22.67		37.69	68.91	61.92		25.3		64.37	1599.63	1711.11		1	0	2.07	1.31	38.97	40.67		12	49	41	42	#########
13	30.34		26.09	31.72	31.03	31.03	31.03		18.22	18.03	17.83	26.75	0	0	0.48	0.59	0.67	1.45	2.68	64	30	26	12	9
14			112.62		101.08	92.84			17.06		28.52	16.68	0	0	1.3	0.18	0.86	3.89	0.46	0	94	0	7	36
15			34.78		33.12	60.49			56.56		418.6	1770.25	1	0	1.22	0.62	2.39	6.07	17.26	0	91	0	68	102
Healthy volonteers	sample	A405	HBP (ng/ml)
ASTROX BAL 002	1	0.115	0.980048
ASTROX BAL 3	2	0.114	0.964787
ASTROX BAL 6	3	0.116	0.995416
ASTROX BAL 8	4	0.108	0.875459
ASTROX BAL 9	5	0.104	0.818055
ASTROX BAL 10	6	0.111	0.919642
ASTROX BAL 11	7	0.12	1.05794
ASTROX BAL 12	8	0.108	0.875459
ASTROX BAL 13	9	0.098	0.735202
ASTROX BAL 15	10	0.099	0.748738
ASTROX BAL 16	11	0.106	0.846541
ASTROX BAL 18	12	0.123	1.10594
ASTROX BAL 19	13	0.125	1.13847
ASTROX BAL 20	14	0.108	0.875459
ASTROX BAL 25	15	0.102	0.790002
ASTROX BAL 32	16	0.135	1.30732
